# Supplementary material for: Cardiomyocyte proliferation and progenitor cell recruitment underlie therapeutic regeneration after myocardial infarction in the adult mouse heart
Source: PubMed Central journal article supplement (PMC3569637; doi:10.1002/emmm.201201737), 2013-01-29
Supplement: emmm0005-0191-SD1.pdf [file emmm0005-0191-SD1.pdf]

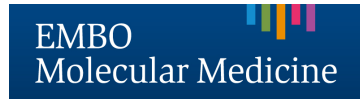

## **Cardiomyocyte proliferation and progenitor cell recruitment underlie therapeutic regeneration after myocardial infarction in the adult mouse heart**

Konstantinos Malliaras, Yiqiang Zhang, Jeffrey Seinfeld, Giselle Galang, Eleni Tseliou, Ke Cheng, Baiming Sun, Mohammad Aminzadeh, Eduardo Marbán

*Corresponding author: Eduardo Marbán, Cedars-Sinai Heart Institute*

---

### **Review timeline:**

Submission date:  
Accepted:

13 July 2012  
07 December 2012

---

### **Transaction Report:**

No Peer Review Process File is available with this article, as the authors have chosen not to make the review process public in this case.
